# Supplementary material for: Genotyping-By-Sequencing (GBS) Detects Genetic Structure and Confirms Behavioral QTL in Tame and Aggressive Foxes (Vulpes vulpes)
Source: PubMed Central journal article supplement (PMC4465646; doi:10.1371/journal.pone.0127013), 2015-06-10

### Figure S3. Allele frequency differences and significant $F_{ST}$ windows on VVU8.

The black dots within the gray bar on the top indicate regions with  $F_{ST} \geq 0.5$ . Yellow dots are the Bonferroni corrected significance of the allele frequency differences between the tame and aggressive populations calculated by PLINK2. The y-axis indicates  $-\log_{10}$  (Bonferroni corrected p-value) for SNP allele frequency differences. Genomic positions in fox, as extrapolated from syntenic regions in the dog genome, are plotted on the x-axis. The black horizontal line corresponds to a significance cutoff of  $(-\log_{10} = 6)$  for the allele frequency differences. The horizontal colored bars on the x-axis correspond to syntenic dog chromosomes. Two genes, *GRIN2B* (*NMDA*) and *GABARAPL1* (*GEC1*), that represent interesting positional candidate genes are shown.

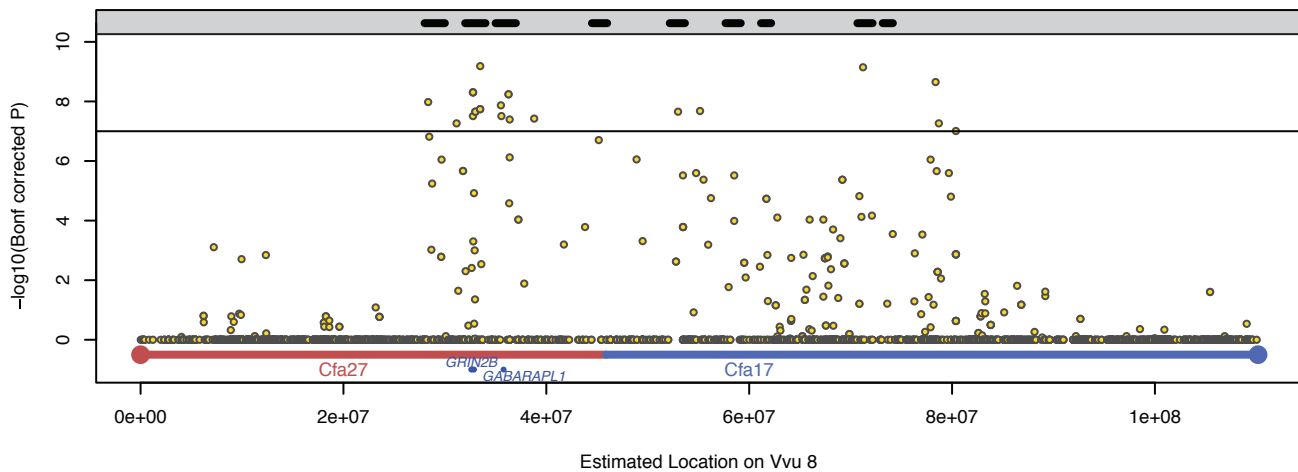

Supplement: pone.0127013.s003.pdf [file pone.0127013.s003.pdf]
