# Supplementary material for: Genotyping-By-Sequencing (GBS) Detects Genetic Structure and Confirms Behavioral QTL in Tame and Aggressive Foxes (Vulpes vulpes)
Source: PubMed Central journal article supplement (PMC4465646; doi:10.1371/journal.pone.0127013), 2015-06-10
Supplement: pone.0127013.s006.pdf [file pone.0127013.s006.pdf]

**Table S1. Adapters used for construction of *EcoT22I* library.** The adapters comprised a set of 48 different barcode-containing adapters (A and B) and a “common” adapter.

| <b>Barcode-containing adapters:</b> |                                               |         |            |            |            |
|-------------------------------------|-----------------------------------------------|---------|------------|------------|------------|
| A                                   | 5' -ACACTCTTTCCCTACACGACGCTCTTCCGATCTxxxxTGCA |         |            |            |            |
| B                                   | 5' -yyyyAGATCGGAAGAGCGTCGTGTAGGGAAAGAGTGT     |         |            |            |            |
| <b>Barcodes “xxxx”:</b>             |                                               |         |            |            |            |
| TGACGCCA                            | CAGATA                                        | GAAGTG  | TAGCGGAT   | TATTTCGCAT | ATAGAT     |
| CCGAACA                             | GGAAGACAT                                     | GGCTTA  | AACGCACATT | GAGCGACAT  | CCTTGCCATT |
| GGTATA                              | TCTTGG                                        | GGTGT   | GGATA      | CTAAGCA    | ATTAT      |
| GCGCTCA                             | ACTGCGAT                                      | TTCGTT  | ATATAA     | TGGCAACAGA | CTCGTCG    |
| GCCTACCT                            | CACCA                                         | AATTAG  | GGAACGA    | ACAACCT    | ACTGCT     |
| CGTGGACAGT                          | TGGCACAGA                                     | TGCTT   | GCAAGCCAT  | CGCACCAATT | CTCGCGG    |
| AACTGG                              | ATGAGCAA                                      | CTTGA   | GCGTCCT    | ACCAGGA    | CCACTCA    |
| TCACGGAAG                           | TATCA                                         | TAGCCAA | ATATCGCCA  | CTCTA      | GGTGCACATT |
| <b>Common adapters:</b>             |                                               |         |            |            |            |
| C                                   | 5' -AGATCGGAAGAGCGGTTCAGCAGGAATGCCGAG         |         |            |            |            |
| D                                   | 5' -CTCGGCATTCCTGCTGAACCGCTCTTCCGATCTTGCA     |         |            |            |            |
