# Supplementary material for: Genotyping-By-Sequencing (GBS) Detects Genetic Structure and Confirms Behavioral QTL in Tame and Aggressive Foxes (Vulpes vulpes)
Source: PubMed Central journal article supplement (PMC4465646; doi:10.1371/journal.pone.0127013), 2015-06-10
Supplement: pone.0127013.s007.pdf [file pone.0127013.s007.pdf]

**Table S2. Bins used for calculation of average  $r^2$  between SNPs located on the same chromosome.**

| <b>Bin length</b> | <b>Number of SNP pairs in Tame population</b> | <b>Percent of SNP pairs with <math>r^2=1</math> in Tame population</b> | <b>Number of SNP pairs in Aggressive population</b> | <b>Percent of SNP pairs with <math>r^2=1</math> in Aggressive population</b> |
|-------------------|-----------------------------------------------|------------------------------------------------------------------------|-----------------------------------------------------|------------------------------------------------------------------------------|
| 1-1000 bp         | 4,723                                         | 66.27%                                                                 | 5,294                                               | 62.56%                                                                       |
| 1 kb-5 kb         | 136                                           | 31.62%                                                                 | 170                                                 | 20.59%                                                                       |
| 5 kb-10 kb        | 185                                           | 16.22%                                                                 | 219                                                 | 21.46%                                                                       |
| 10 kb-20 kb       | 471                                           | 12.10%                                                                 | 502                                                 | 7.37%                                                                        |
| 20 kb-50 kb       | 1,004                                         | 10.26%                                                                 | 1,184                                               | 6.17%                                                                        |
| 50 kb-100 kb      | 1,686                                         | 6.52%                                                                  | 1,998                                               | 3.60%                                                                        |
| 100 kb-500 kb     | 11,752                                        | 5.50%                                                                  | 14,451                                              | 2.15%                                                                        |
| 500 kb-1 Mb       | 14,407                                        | 2.91%                                                                  | 17,654                                              | 1.43%                                                                        |
| 1 Mb-5 Mb         | 69,717                                        | 1.48%                                                                  | 120,932                                             | 0.69%                                                                        |
| 5 Mb-10 Mb        | 104,237                                       | 0.67%                                                                  | 131,928                                             | 0.21%                                                                        |
| 10 Mb-20 Mb       | 176,447                                       | 0.40%                                                                  | 221,294                                             | 0.12%                                                                        |
| 20 Mb-50 Mb       | 355,304                                       | 0.25%                                                                  | 441,773                                             | 0.11%                                                                        |
| 50 Mb-100 Mb      | 430,446                                       | 0.16%                                                                  | 537,138                                             | 0.06%                                                                        |
| 100 Mb-210Mb      | 267,573                                       | 0.10%                                                                  | 328,622                                             | 0.03%                                                                        |
