# Supplementary material for: Genotyping-By-Sequencing (GBS) Detects Genetic Structure and Confirms Behavioral QTL in Tame and Aggressive Foxes (Vulpes vulpes)
Source: PubMed Central journal article supplement (PMC4465646; doi:10.1371/journal.pone.0127013), 2015-06-10
Supplement: pone.0127013.s008.pdf [file pone.0127013.s008.pdf]

**Table S3. Florescent primers used for genotyping S1\_1977727423 associated indels and SSRs markers on VVU3.**

| <b>Marker</b> | <b>Forward</b>         | <b>Reverse</b>         | <b>Dye</b> | <b>Amplicon size</b> |
|---------------|------------------------|------------------------|------------|----------------------|
| 26749b        | CTGGTCTGGGCTCCTTGTCTCA | TCGGGAGAACAGAGGGTAAGGA | NED        | 372-378              |
| VV0683        | CCGGCCACCAGATAACAATTT  | AGCTGCTCAGAGCCACACTG   | VIC        | 363-390              |
| CM6.72b       | GCTGTCCAAAATGCAGACAA   | TCTCAGTAGCCCAGGAAGA    | 6-FAM      | 151-172              |
| CM6.75        | TTGAAGCCATCTGAAAGCAG   | CAGATGGCAAGACCTCTTCA   | VIC        | 178-195              |
