# Supplementary material for: Genotyping-By-Sequencing (GBS) Detects Genetic Structure and Confirms Behavioral QTL in Tame and Aggressive Foxes (Vulpes vulpes)
Source: PubMed Central journal article supplement (PMC4465646; doi:10.1371/journal.pone.0127013), 2015-06-10
Supplement: pone.0127013.s010.pdf [file pone.0127013.s010.pdf]

**Table S5. SNP evaluation statistics.**

**(A) Analysis of heterozygosity of SNPs whose positions were assigned to the X chromosome outside of pseudoautosomal region (PAR).** SNPs assigned to the PAR (0-6.65Mb on dog X chromosome) were not included in this analysis. The filtered set (48,294 SNPs) included 1,065 of SNPs located on X chromosome outside of PAR. The stringently filtered SNP set (8,437 SNPs) included 105 SNPs located on X chromosome outside of PAR.

| SNP set                  | Population | Average percent of heterozygous males per SNP | Average percent of heterozygous females per SNP |
|--------------------------|------------|-----------------------------------------------|-------------------------------------------------|
| Filtered set             | Tame       | 5.4%                                          | 12.4%                                           |
|                          | Aggressive | 5.4%                                          | 13.9%                                           |
| Stringently filtered set | Tame       | 1.2%                                          | 25.2%                                           |
|                          | Aggressive | 1.0%                                          | 29.4%                                           |

**(B) Evaluation of the SNP call reproducibility in duplicated samples.**

| SNP set                  | Percent of SNPs for which genotypes of replicates were in perfect concordance | The average read depth for the discordant SNPs | The average read depth for the concordant SNPs |
|--------------------------|-------------------------------------------------------------------------------|------------------------------------------------|------------------------------------------------|
| Filtered set             | 66.5-73.8%                                                                    | 14.0 ± 25.4                                    | 34.0 ± 41.6                                    |
| Stringently filtered set | 97.9-99.2%                                                                    | 55.3 ± 39.8                                    | 76.1 ± 38.2                                    |
