# Supplementary material for: Genotyping-By-Sequencing (GBS) Detects Genetic Structure and Confirms Behavioral QTL in Tame and Aggressive Foxes (Vulpes vulpes)
Source: PubMed Central journal article supplement (PMC4465646; doi:10.1371/journal.pone.0127013), 2015-06-10
Supplement: pone.0127013.s011.pdf [file pone.0127013.s011.pdf]

**Table S6. Genomic regions highlighted in the fixation index ( $F_{ST}$ ) analysis.** Windows with  $F_{ST} \geq 0.5$  are listed. The fox chromosomes with more than one significant window and syntenic regions in the dog genome are shaded in gray. Windows which include SNPs reported in Table 2 are highlighted in yellow.

| CFA | Start position in the Dog genome (bp) | End position in the Dog genome (bp) | VVU | Start position in the Fox genome (bp) | End position in the Fox genome (bp) | Number of SNPs in the window | Weighted $F_{ST}$ |
|-----|---------------------------------------|-------------------------------------|-----|---------------------------------------|-------------------------------------|------------------------------|-------------------|
| 1   | 29,500,001                            | 30,500,000                          | 1   | 92,178,785                            | 93,178,785                          | 5                            | 0.56              |
| 6   | 66,000,001                            | 67,000,000                          | 3   | 138,935,427                           | 139,935,427                         | 12                           | 0.54              |
| 6   | 68,500,001                            | 69,500,000                          | 3   | 141,435,427                           | 142,435,427                         | 9                            | 0.59              |
| 8   | 32,500,001                            | 33,500,000                          | 6   | 93,939,935                            | 94,939,935                          | 12                           | 0.60              |
| 8   | 67,000,001                            | 68,000,000                          | 6   | 128,439,935                           | 129,439,935                         | 25                           | 0.51              |
| 27  | 28,000,001                            | 29,000,000                          | 8   | 28,000,001                            | 29,000,001                          | 18                           | 0.63              |
| 27  | 29,000,001                            | 30,000,000                          | 8   | 29,000,001                            | 30,000,001                          | 19                           | 0.51              |
| 27  | 32,000,001                            | 33,000,000                          | 8   | 32,000,001                            | 33,000,001                          | 27                           | 0.54              |
| 27  | 32,500,001                            | 33,500,000                          | 8   | 32,500,001                            | 33,500,001                          | 29                           | 0.64              |
| 27  | 33,000,001                            | 34,000,000                          | 8   | 33,000,001                            | 34,000,001                          | 15                           | 0.61              |
| 27  | 35,000,001                            | 36,000,000                          | 8   | 35,000,001                            | 36,000,001                          | 6                            | 0.56              |
| 27  | 35,500,001                            | 36,500,000                          | 8   | 35,500,001                            | 36,500,001                          | 15                           | 0.65              |
| 27  | 36,000,001                            | 37,000,000                          | 8   | 36,000,001                            | 37,000,001                          | 13                           | 0.61              |
| 27  | 44,500,001                            | 45,500,000                          | 8   | 44,500,001                            | 45,500,001                          | 4                            | 0.62              |
| 27  | 45,000,001                            | 46,000,000                          | 8   | 45,000,001                            | 46,000,001                          | 4                            | 0.62              |
| 17  | 57,000,001                            | 58,000,000                          | 8   | 52,165,769                            | 53,165,769                          | 3                            | 0.84              |
| 17  | 56,500,001                            | 57,500,000                          | 8   | 52,665,769                            | 53,665,769                          | 16                           | 0.54              |
| 17  | 51,500,001                            | 52,500,000                          | 8   | 57,665,769                            | 58,665,769                          | 7                            | 0.73              |
| 17  | 51,000,001                            | 52,000,000                          | 8   | 58,165,769                            | 59,165,769                          | 3                            | 0.78              |
| 17  | 48,000,001                            | 49,000,000                          | 8   | 61,165,769                            | 62,165,769                          | 8                            | 0.52              |
| 17  | 38,500,001                            | 39,500,000                          | 8   | 70,665,769                            | 71,665,769                          | 11                           | 0.60              |
| 17  | 38,000,001                            | 39,000,000                          | 8   | 71,165,769                            | 72,165,769                          | 6                            | 0.56              |
| 17  | 36,000,001                            | 37,000,000                          | 8   | 73,165,769                            | 74,165,769                          | 4                            | 0.51              |
| 7   | 41,500,001                            | 42,500,000                          | 13  | 122,752,749                           | 123,752,749                         | 1                            | 0.51              |
| 3   | 43,000,001                            | 44,000,000                          | 14  | 90,698,780                            | 91,698,780                          | 23                           | 0.66              |
| 3   | 43,500,001                            | 44,500,000                          | 14  | 91,198,780                            | 92,198,780                          | 16                           | 0.66              |
| X   | 104,500,001                           | 105,500,000                         | X   | 104,500,001                           | 105,500,001                         | 8                            | 0.50              |
| X   | 114,000,001                           | 115,000,000                         | X   | 114,000,001                           | 115,000,001                         | 14                           | 0.52              |
