# Supplementary material for: Genotyping-By-Sequencing (GBS) Detects Genetic Structure and Confirms Behavioral QTL in Tame and Aggressive Foxes (Vulpes vulpes)
Source: PLoS One. 2015 Jun 10;10(6):e0127013. doi: 10.1371/journal.pone.0127013 (PMC4465646; doi:10.1371/journal.pone.0127013)

## Figure S2. Fixation index (F<sub>ST</sub>) analysis in fox populations.

Fixation index (F<sub>ST</sub>) values were computed for 1 Mb windows for tame versus aggressive fox populations. The y-axis indicates “weighted\_FST” values calculated with VCFtools. The x-axis indicates genomic positions on fox chromosomes, as extrapolated from syntenic regions in the dog genome. Each dot represents a 1 Mb window, the windows overlap by 500 kb. The horizontal black line indicates F<sub>ST</sub>=0.5. The results of the F<sub>ST</sub> analysis are consistent with the analysis of allele frequency differences.

**S2A. Distribution of F<sub>ST</sub> values in the fox genome.** The chromosomes are indicated by color change. The positions of VVU3, VVU8 and VVU14 are shown.

**S2B. F<sub>ST</sub> values on VVU3, VVU8, and VVU14.** The regions with high F<sub>ST</sub> values identified on these chromosomes overlap with the regions identified in the analysis of allele frequency differences (see also Table S6).

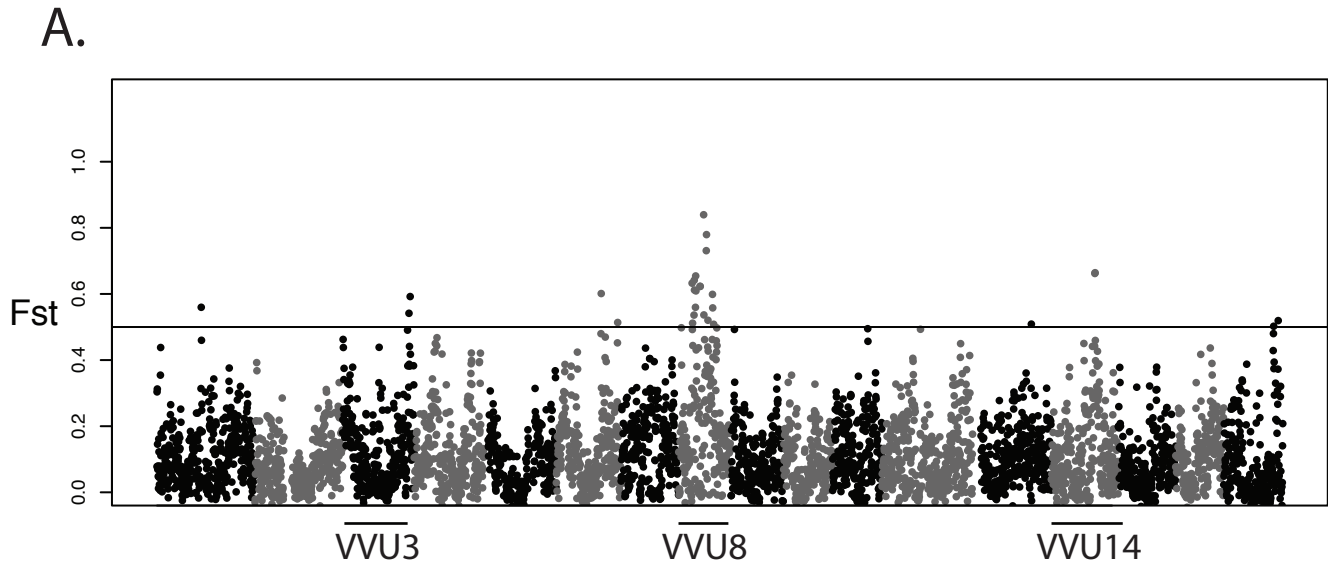

B.

VVU3

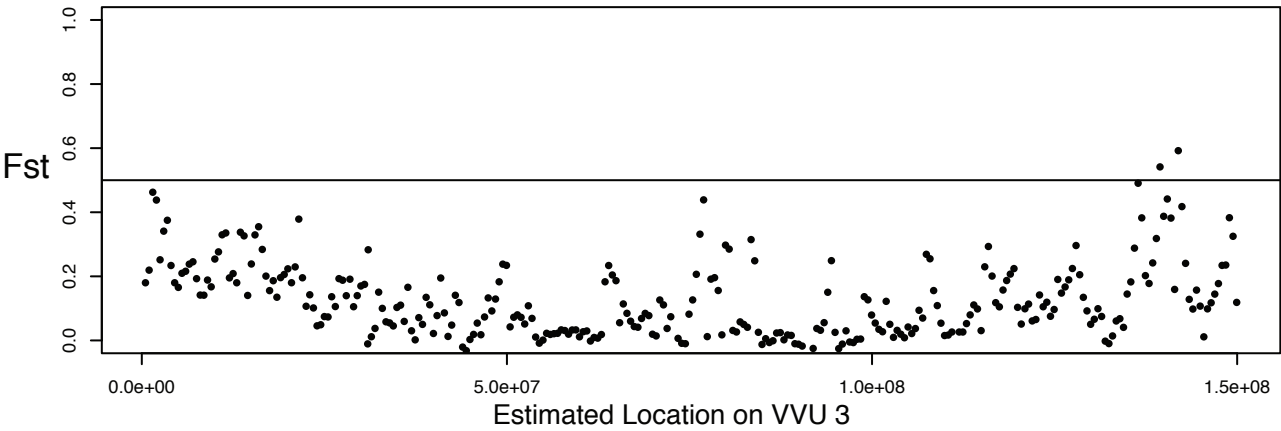

VVU8

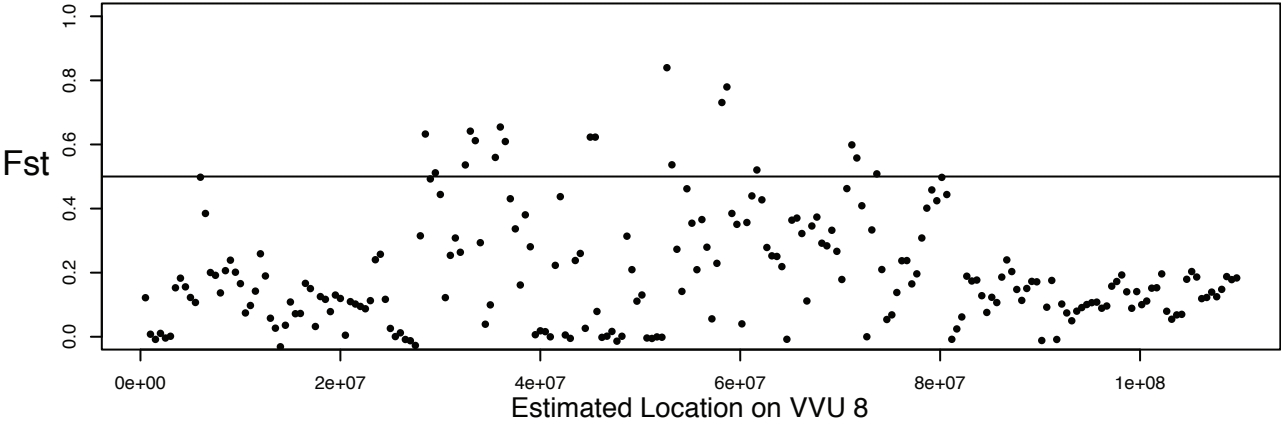

VVU14

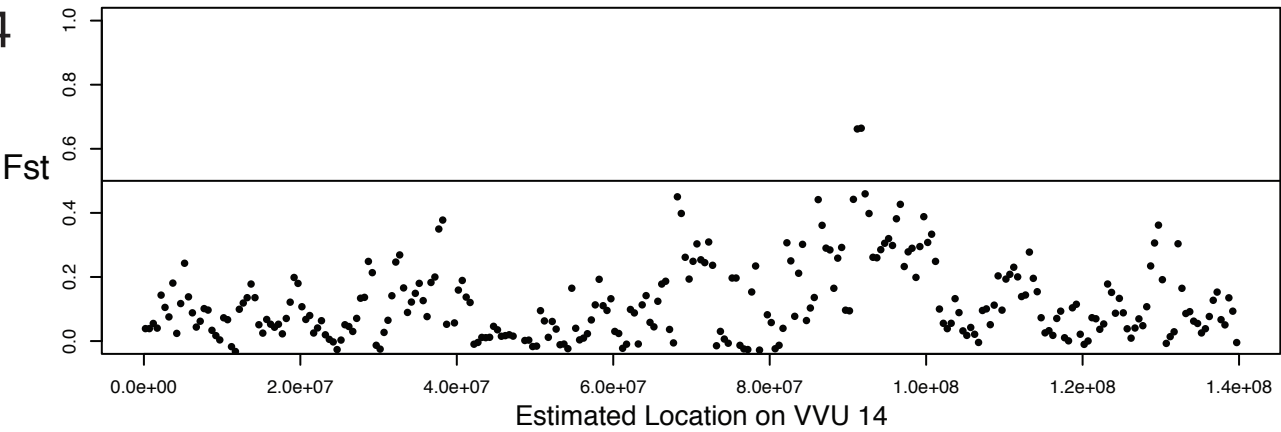

Supplement: S2 Fig — (PDF) [file pone.0127013.s002.pdf]
